# Supplementary material for: A covalently conjugated branched DNA aptamer cluster-based nanoplatform for efficiently targeted drug delivery
Source: Royal Society of Chemistry journal article supplement (doi:10.1039/d2nr01252a), 2022-01-01
Supplement: d2nr01252a1.pdf [file d2nr01252a1.pdf]

## Supporting Information

### A covalently conjugated branched DNA aptamer cluster-based nanoplatfom for efficiently targeted drug delivery†

Runze Li,†<sup>a</sup> Xiaohui Wu,†<sup>b,c</sup> Jing Li,†<sup>a</sup> Xuehe Lu,<sup>b</sup> Robert Chunhua Zhao,\*<sup>a,d</sup>  
Jianbing Liu\*<sup>b,c</sup> and Baoquan Ding\*<sup>b,c</sup>

<sup>a</sup>Institute of Basic Medical Sciences Chinese Academy of Medical Sciences, School of Basic Medicine Peking Union Medical College, Beijing 100730, China.

<sup>b</sup>CAS Key Laboratory of Nanosystem and Hierarchical Fabrication, National Center for Nanoscience and Technology, Beijing 100190, China.

<sup>c</sup>University of Chinese Academy of Sciences, Beijing 100049, China.

<sup>d</sup>School of Life Sciences, Shanghai University, Shanghai 200444, China.

†These authors contributed equally to this work.

Corresponding: zhaochunhua@ibms.pumc.edu.cn, liujb@nanoctr.cn, dingbq@nanoctr.cn.

### Table of contents

#### Additional figures

|                  |     |
|------------------|-----|
| Figure S1        | S2  |
| Figure S2        | S3  |
| Figure S3        | S4  |
| Figure S4        | S5  |
| Figure S5        | S6  |
| Figure S6        | S7  |
| Figure S7        | S8  |
| Figure S8        | S9  |
| Figure S9        | S10 |
| Figure S10       | S11 |
| Figure S11       | S12 |
| Figure S12       | S13 |
| Unprocessed gels | S14 |

#### Additional tables

|          |     |
|----------|-----|
| Table S1 | S15 |
| Table S2 | S15 |

## Additional figures

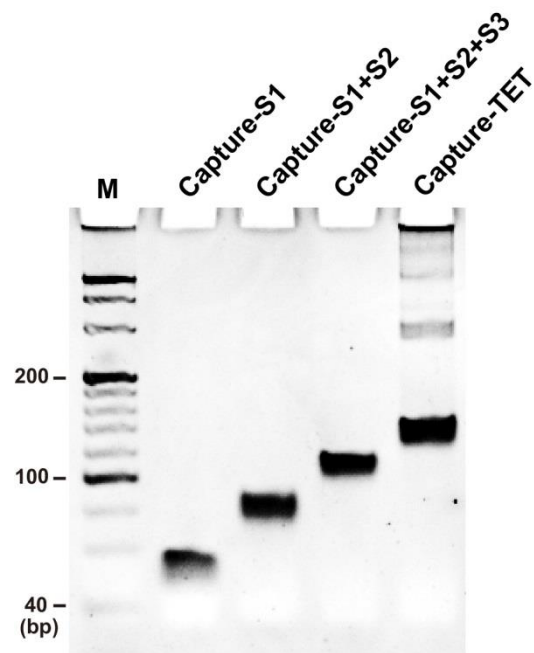

**Fig. S1** 6% native PAGE analysis of step-by-step construction of capture strand-modified tetrahedron (Capture-TET).

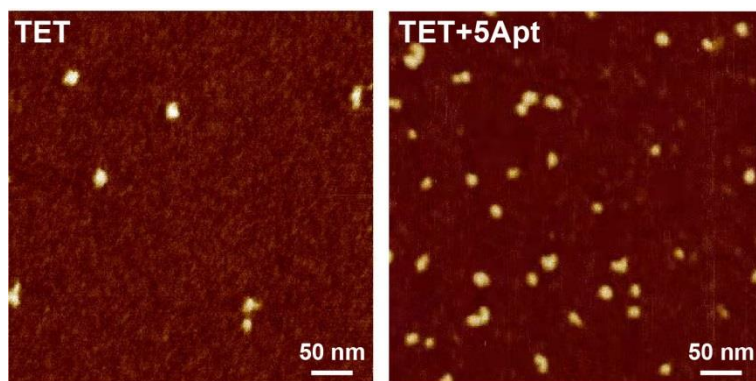

**Fig. S2** AFM images of TET and TET+5Apt, scale bars: 50 nm.

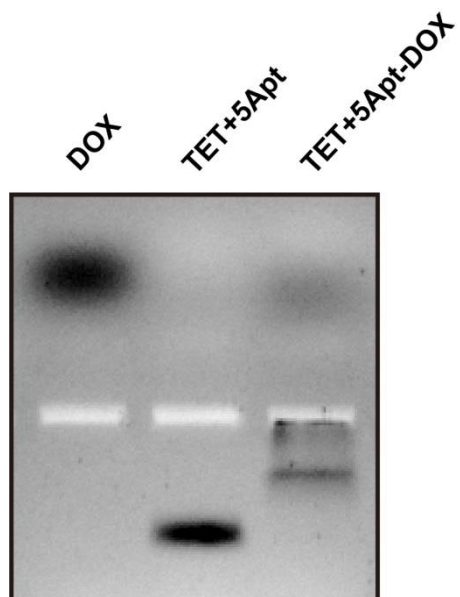

**Fig. S3** 0.7% agarose gel electrophoresis analysis of DOX, TET+5Apt, and TET+5Apt-DOX.

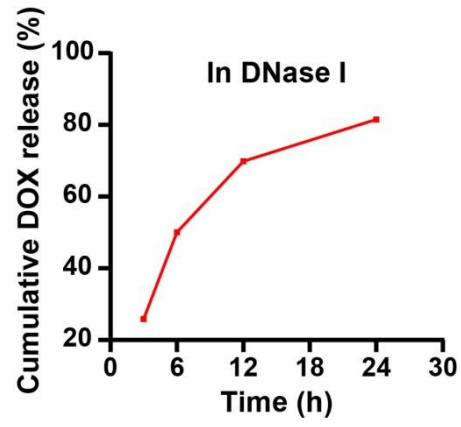

**Fig. S4** Cumulative DOX release efficiency of TET+5Apt-DOX in DNase I.

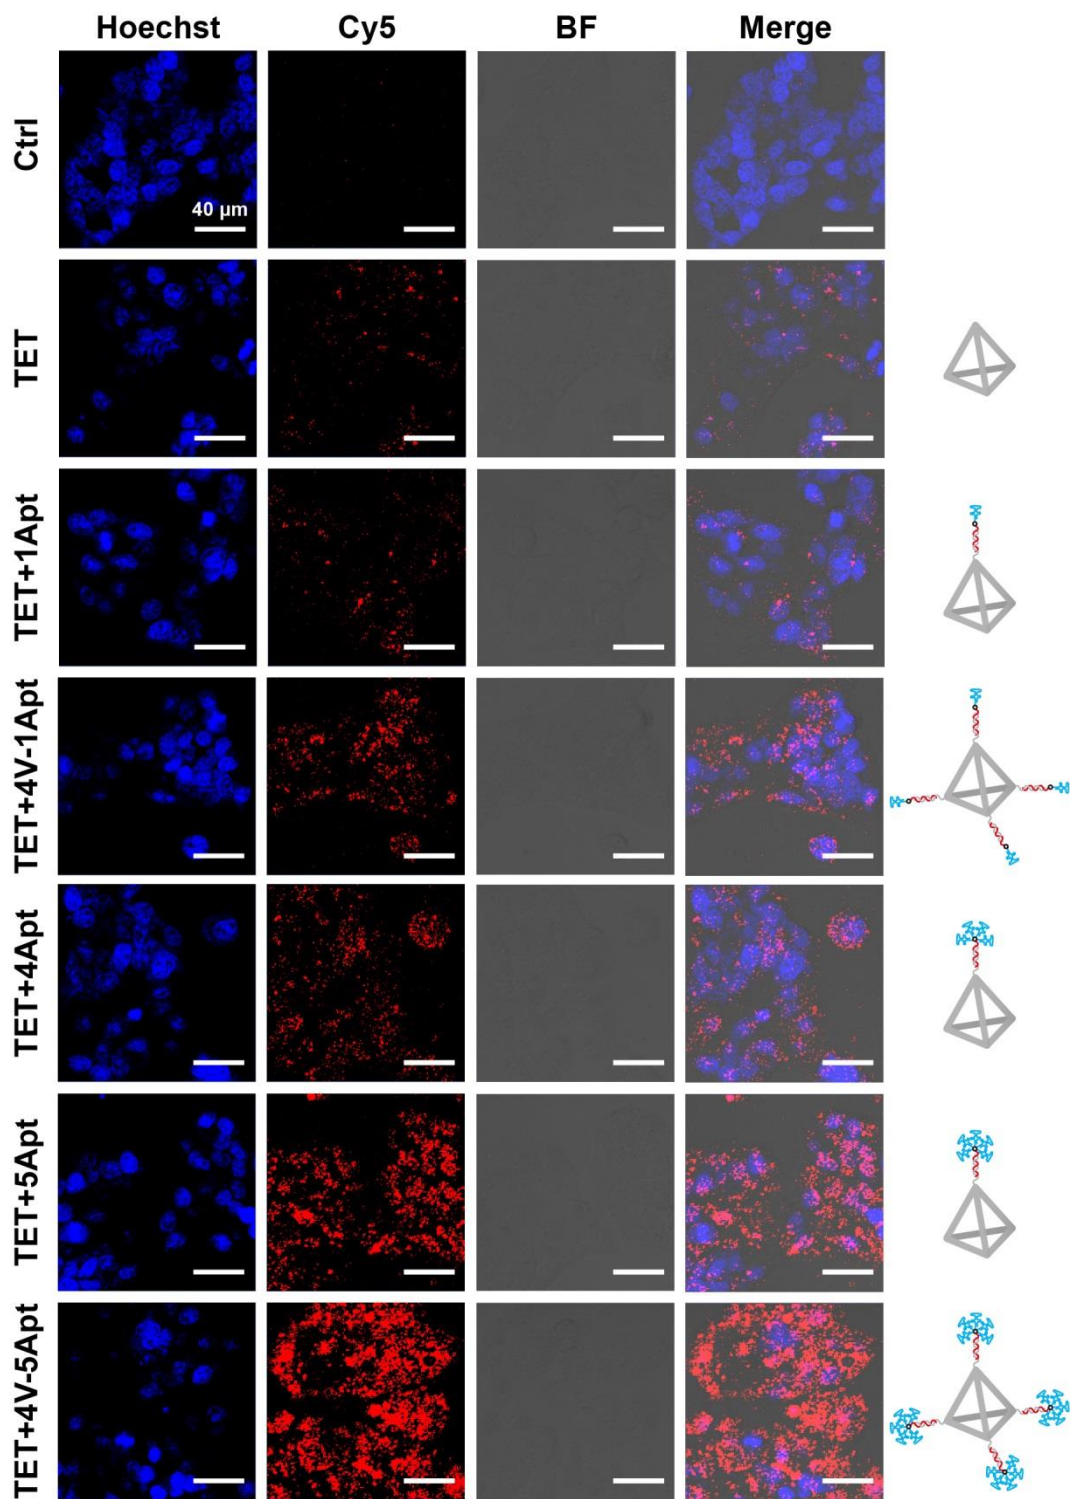

**Fig. S5** Confocal images of MCF-7 cells treated with TET, TET with one aptamer at one vertex (TET+1Apt), TET with one aptamer at each vertex (TET+4V-1Apt), TET with four aptamers at one vertex (TET+4Apt), TET with five aptamers at one vertex (TET+5Apt), or TET with five aptamers at each vertex (TET+4V-5Apt) for 8 h (nuclei were labeled with Hoechst, blue; TETs were labeled with Cy5, red; scale bars: 40  $\mu$ m).

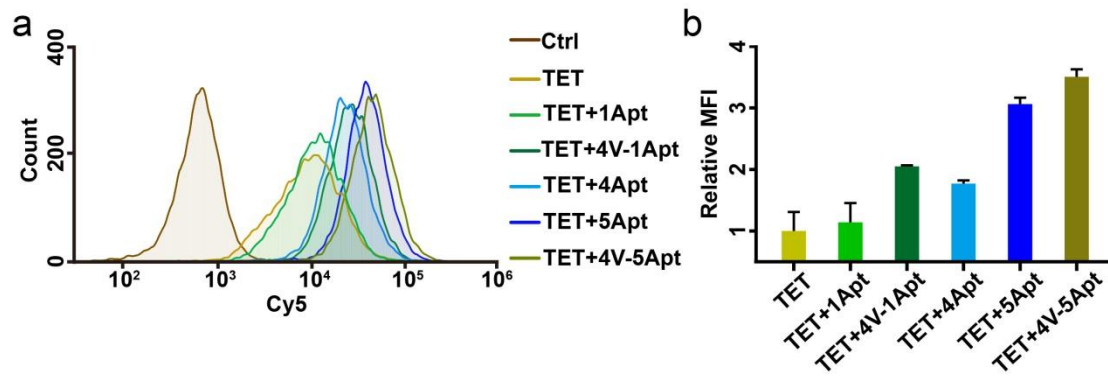

**Fig. S6** (a) Flow cytometry analysis of MCF-7 cells treated with TET, TET with one aptamer at one vertex (TET+1Apt), TET with one aptamer at each vertex (TET+4V-1Apt), TET with four aptamers at one vertex (TET+4Apt), TET with five aptamers at one vertex (TET+5Apt), or TET with five aptamers at each vertex (TET+4V-5Apt) for 8 h. (b) Quantification of the relative mean fluorescence intensity (MFI). The error bars represent the SD values of three independent experiments.

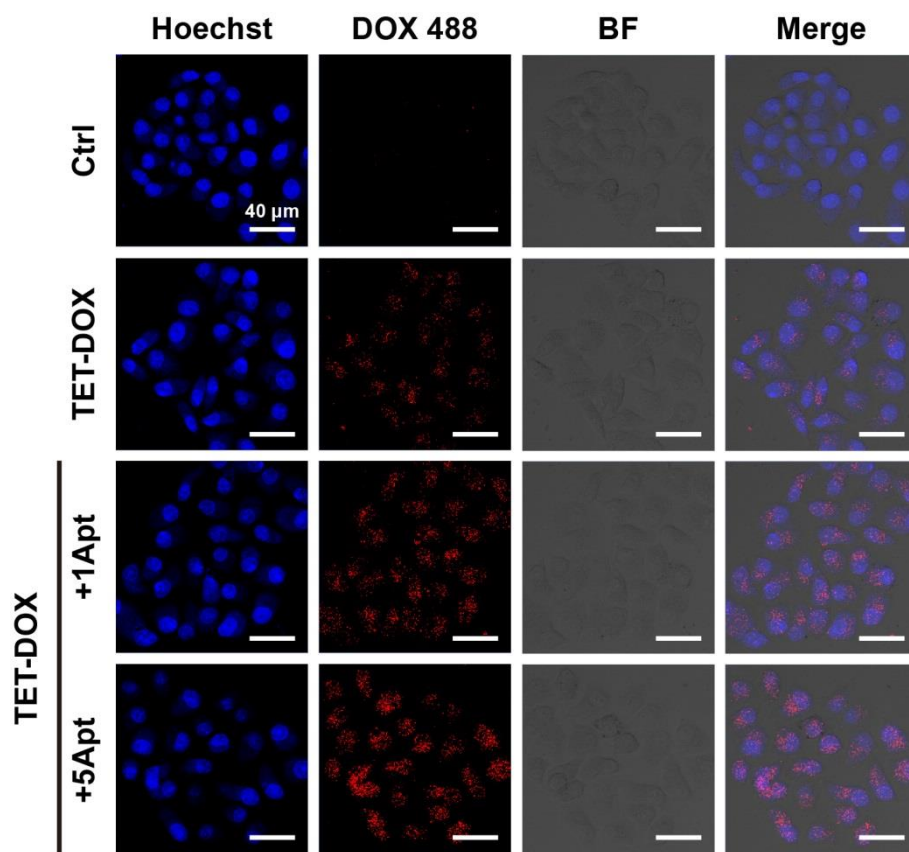

**Fig. S7** Confocal images of MCF-7 cells treated with DOX-loaded TET (TET-DOX), DOX-loaded TET with one aptamer at one vertex (TET+1Apt-DOX), or DOX-loaded TET with five aptamers at one vertex (TET+5Apt-DOX) for 8 h, scale bars: 40  $\mu\text{m}$ .



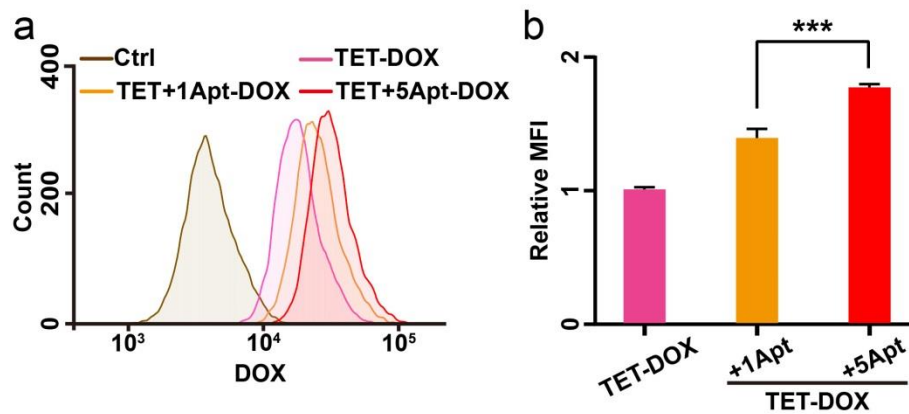

**Fig. S8** (a) Flow cytometry analysis of MCF-7 cells treated with DOX-loaded TET (TET-DOX), DOX-loaded TET with one aptamer at one vertex (TET+1Apt-DOX), or DOX-loaded TET with five aptamers at one vertex (TET+5Apt-DOX) for 8 h (b) Quantification of the relative mean fluorescence intensity (MFI). The error bars represent the SD values of three independent experiments. (t test: \*\*\* $P < 0.001$ ).

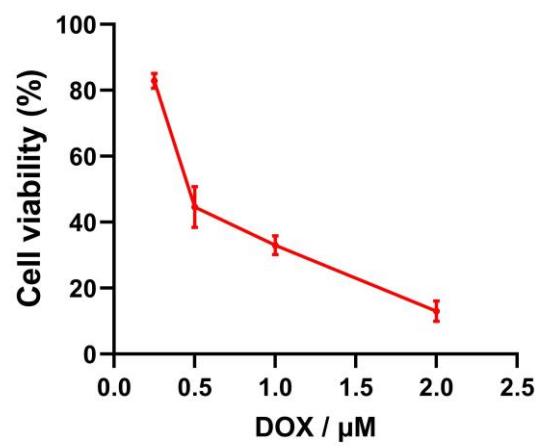

**Fig. S9** Cell viability of MCF-7 cells treated by different concentrations of DOX. The error bars represent the SD values of three independent experiments.

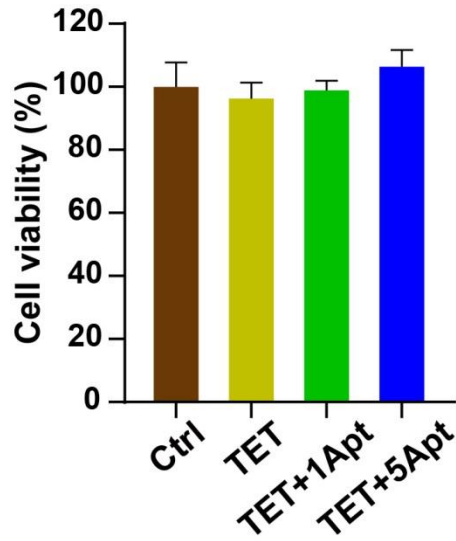

**Fig. S10** Cell viability of MCF-7 cells with the indicated treatments of TET, TET+1Apt, or TET+5Apt, respectively. The error bars represent the SD values of three independent experiments.

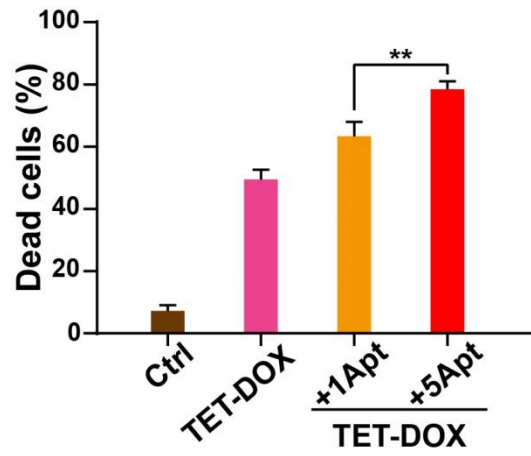

**Fig. S11** Statistic analysis of the percentage of dead cells by Image J analysis. The error bars represent the SD values of three independent experiments. (t test:  $**P < 0.01$ ).

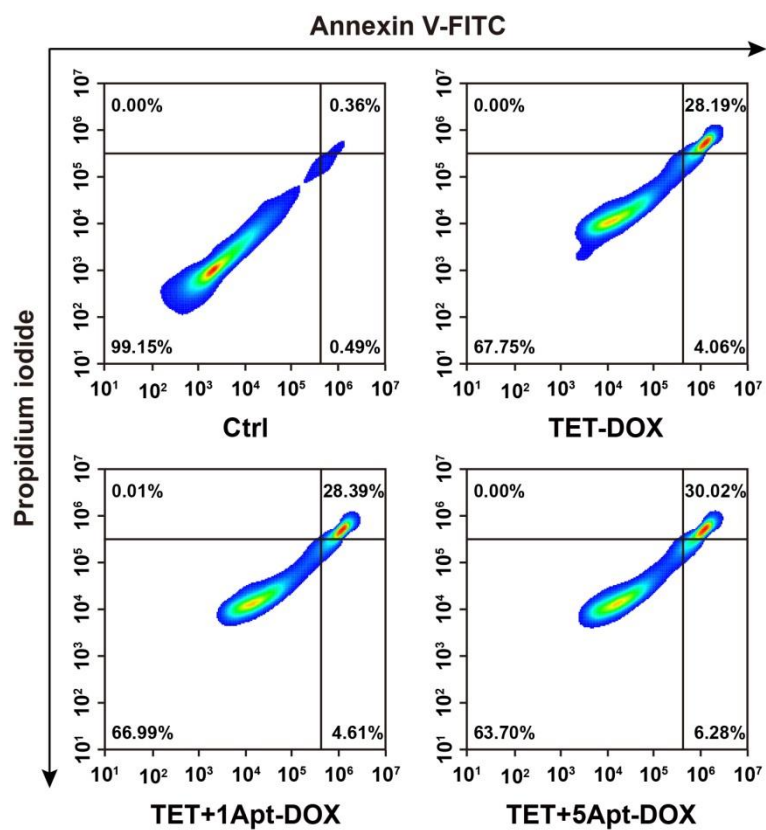

**Fig. S12** Cell apoptosis analysis of L929 cells treated with DOX-loaded TET (TET-DOX), DOX-loaded TET with one aptamer at one vertex (TET+1Apt-DOX), or DOX-loaded TET with five aptamers at one vertex (TET+5Apt-DOX). (DOX: 2.0  $\mu$ M).

**Unprocessed gels**

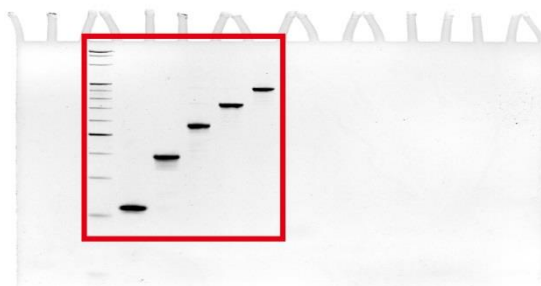

Raw gel for Fig. 2(b)

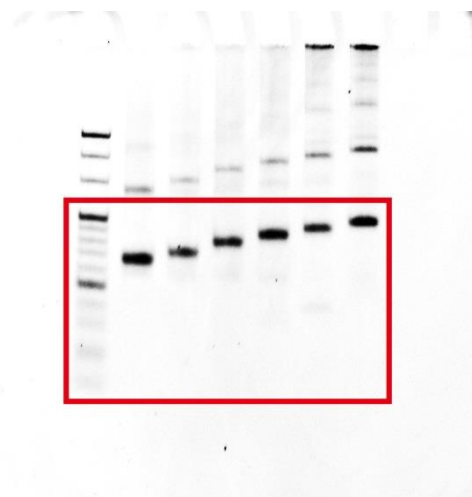

Raw gel for Fig. 3(a)

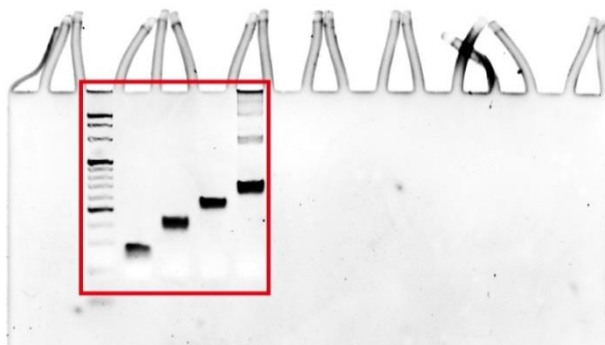

Raw gel for Fig. S1

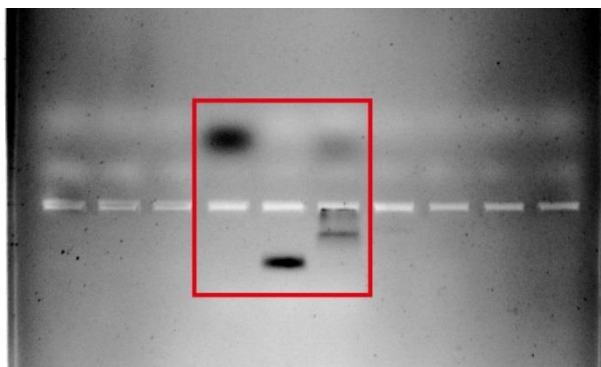

Raw gel for Fig. S3

## Additional tables

**Table S1 DNA sequences of the aptamer and linker**

| Name    | Sequence (5'-3')                                |
|---------|-------------------------------------------------|
| Aptamer | GCAGTTGATCCTTTGGATAACCCTGGTTTTT-NH <sub>2</sub> |
| Linker  | NH <sub>2</sub> -CTCTCTCTCTCTCTCCTCTC           |

**Table S2 DNA sequences for assembly of DNA tetrahedron**

| Name           | Sequence (5'-3')                                                                          |
|----------------|-------------------------------------------------------------------------------------------|
| S1             | TATCACCAGGCAGTTGACAGTGTAGCAAGCTGTAATAGATGC<br>GAGGGTCCAATAC                               |
| S2             | TCAACTGCCTGGTGATAAAACGACACTACGTGGGAATCTACT<br>ATGGCGGCTCTTC                               |
| S3             | TTCAGACTTAGGAATGTGCTTCCCACGTAGTGTCGTTTGTATT<br>GGACCCTCGCAT                               |
| S4             | ACATTCCTAAGTCTGAAACATTACAGCTTGCTACACGAGAAG<br>AGCCGCCATAGTA                               |
| Capture-S1     | TATCACCAGGCAGTTGACAGTGTAGCAAGCTGTAATAGATGCG<br>AGGGTCCAATACTTTTTGAGAGGAGAGAGAGAGAGAG      |
| Capture-S2     | TCAACTGCCTGGTGATAAAACGACACTACGTGGGAATCTACT<br>ATGGCGGCTCTTCTTTTTGAGAGGAGAGAGAGAGAGAGAG    |
| Capture-S3     | TTCAGACTTAGGAATGTGCTTCCCACGTAGTGTCGTTTGTATT<br>GGACCCTCGCATTTTTGAGAGGAGAGAGAGAGAGAGAG     |
| Capture-S4     | ACATTCCTAAGTCTGAAACATTACAGCTTGCTACACGAGAAG<br>AGCCGCCATAGTATTTTTGAGAGGAGAGAGAGAGAGAGAG    |
| Cy5-S3         | Cy5-TTCAGACTTAGGAATGTGCTTCCCACGTAGTGTCGTTTGT<br>ATTGGACCCTCGCAT                           |
| Cy5-Capture-S3 | Cy5-TTCAGACTTAGGAATGTGCTTCCCACGTAGTGTCGTTTGT<br>ATTGGACCCTCGCATTTTTGAGAGGAGAGAGAGAGAGAGAG |
